# Supplementary material for: Mesh size analysis of cellulose nanofibril hydrogels using solute exclusion and PFG-NMR spectroscopy
Source: Royal Society of Chemistry journal article supplement (doi:10.1039/c5sm01752a), 2015-01-01
Supplement: c5sm01752a1.pdf [file c5sm01752a1.pdf]

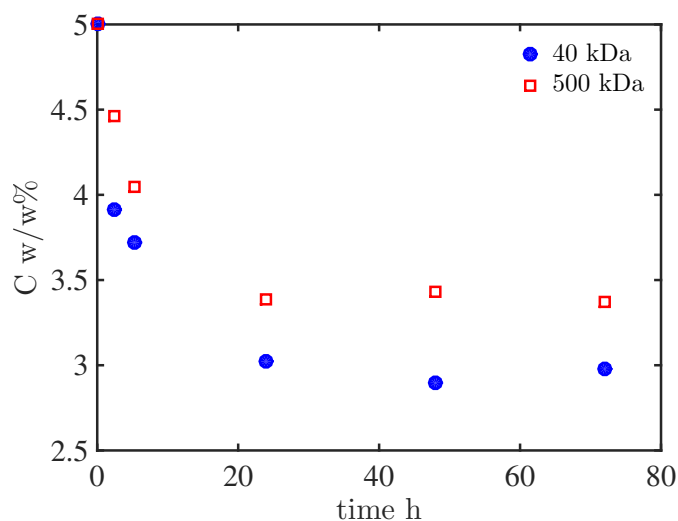

Figure 1: Dextran concentration in the solution phase as a function of time. Initial concentration = 5 w/w%. Dextran 40 kDa solution is exposed to 0.7 w/w% CNF suspension cross-linked with DAO, dextran 500 kDa solution is exposed to 0.7 w/w% CNF suspension cross-linked with DAB.

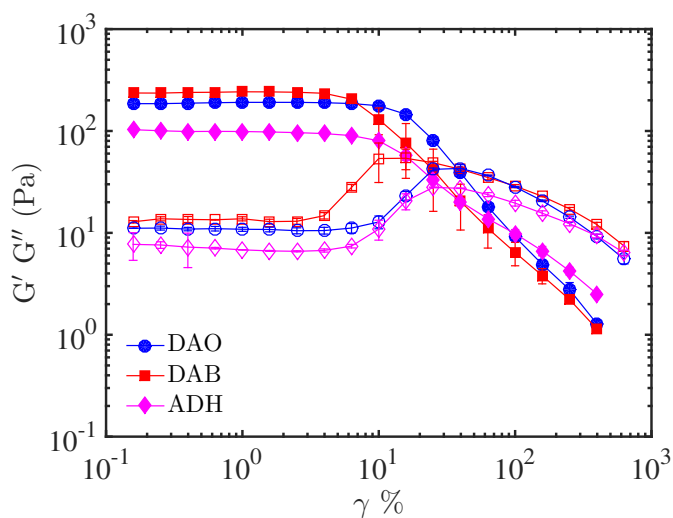

Figure 2: Elastic and viscous moduli of CNF suspensions cross-linked with the three diamines. Error bars show the standard deviation from the average of three trials.
